# Supplementary material for: Optimization of Spray Drying Process Parameters for the Preparation of Inhalable Mannitol-Based Microparticles Using a Box-Behnken Experimental Design
Source: MDPI journal article supplement (doi:10.3390/pharmaceutics15020496), 2023-02-02
Supplement: s1 [file s1]

**Table S1.** Results of experiment for variables measured in 3 replications: raw data with indicated outliers

| Run | Drying temperature (X <sub>1</sub> ) [°C] | Pump speed (X <sub>2</sub> ) [ml/min] | Air speed (X <sub>3</sub> ) [m/s] | S (Y <sub>1</sub> ) [μm] | MMAD (Y <sub>2</sub> ) [μm] | NMAD (Y <sub>3</sub> ) [μm] | MMAD RSD (Y <sub>4</sub> ) [%] |
|-----|-------------------------------------------|---------------------------------------|-----------------------------------|--------------------------|-----------------------------|-----------------------------|--------------------------------|
| 1   | 100                                       | 5                                     | 3.6                               | 11.13                    | 7.50                        | 3.40                        | 36.4                           |
| 1   | 100                                       | 5                                     | 3.6                               | 9.16                     | 8.00                        | 3.80                        | 33.3                           |
| 1   | 100                                       | 5                                     | 3.6                               | 7.09                     | 7.50                        | 6.05*                       | 35.8                           |
| 2   | 140                                       | 5                                     | 3.6                               | 22.12                    | 8.67                        | 4.30*                       | 29.9                           |
| 2   | 140                                       | 5                                     | 3.6                               | 15.32*                   | 8.10                        | 3.78                        | 33.1                           |
| 2   | 140                                       | 5                                     | 3.6                               | 30.54                    | 8.06                        | 3.52                        | 33.8                           |
| 3   | 100                                       | 15                                    | 3.6                               | 40.68*                   | 7.23                        | 3.40                        | 38.3                           |
| 3   | 100                                       | 15                                    | 3.6                               | 40.01                    | 6.98                        | 3.53                        | 38.4                           |
| 3   | 100                                       | 15                                    | 3.6                               | 38.77                    | 6.98                        | 3.52                        | 38.4                           |
| 4   | 140                                       | 15                                    | 3.6                               | 38.20                    | 8.06                        | 3.16                        | 34.3                           |
| 4   | 140                                       | 15                                    | 3.6                               | 35.68                    | 8.35                        | 3.20                        | 31.5                           |
| 4   | 140                                       | 15                                    | 3.6                               | 33.52                    | 8.40                        | 3.30                        | 31.5                           |
| 5   | 100                                       | 10                                    | 3                                 | 6.26                     | 7.20                        | 3.60                        | 36.4                           |
| 5   | 100                                       | 10                                    | 3                                 | 5.22                     | 7.20                        | 3.60                        | 36.2                           |
| 5   | 100                                       | 10                                    | 3                                 | 5.33                     | 7.20                        | 3.90                        | 36.6                           |
| 6   | 140                                       | 10                                    | 3                                 | 36.01                    | 8.67                        | 2.50                        | 29.5                           |
| 6   | 140                                       | 10                                    | 3                                 | 30.67                    | 8.30                        | 2.64                        | 30.6                           |
| 6   | 140                                       | 10                                    | 3                                 | 29.53                    | 8.30                        | 2.90                        | 43.1*                          |
| 7   | 100                                       | 10                                    | 4.2                               | 12.74                    | 7.00                        | 3.40                        | 35.8                           |
| 7   | 100                                       | 10                                    | 4.2                               | 10.81                    | 7.23                        | 2.80                        | 37.9                           |
| 7   | 100                                       | 10                                    | 4.2                               | 9.69                     | 7.77                        | 3.40                        | 35.3                           |
| 8   | 140                                       | 10                                    | 4.2                               | 20.71                    | 8.00                        | 3.05                        | 36.1                           |
| 8   | 140                                       | 10                                    | 4.2                               | 15.21                    | 8.67                        | 3.00                        | 33.4                           |
| 8   | 140                                       | 10                                    | 4.2                               | 19.12                    | 7.50*                       | 3.00                        | 37.6*                          |
| 9   | 120                                       | 5                                     | 3                                 | 8.47                     | 7.50                        | 3.60                        | 35.5                           |
| 9   | 120                                       | 5                                     | 3                                 | 15.78                    | 7.10                        | 3.40                        | 38.4                           |
| 9   | 120                                       | 5                                     | 3                                 | 14.00                    | 6.98                        | 3.40                        | 37.7                           |
| 10  | 120                                       | 15                                    | 3                                 | 8.69                     | 7.50                        | 4.22                        | 35.0                           |
| 10  | 120                                       | 15                                    | 3                                 | 8.74                     | 7.00                        | 4.10                        | 36.2                           |
| 10  | 120                                       | 15                                    | 3                                 | 7.23                     | 7.50                        | 4.10                        | 34.3                           |
| 11  | 120                                       | 5                                     | 4.2                               | 9.77                     | 8.98                        | 3.05                        | 29.9                           |
| 11  | 120                                       | 5                                     | 4.2                               | 14.81*                   | 8.67                        | 3.30                        | 31.1                           |
| 11  | 120                                       | 5                                     | 4.2                               | 5.83                     | 8.40                        | 3.65                        | 29.9                           |
| 12  | 120                                       | 15                                    | 4.2                               | 10.89                    | 7.70                        | 2.95                        | 47.5                           |
| 12  | 120                                       | 15                                    | 4.2                               | 11.89                    | 7.77                        | 3.05                        | 81.9*                          |
| 12  | 120                                       | 15                                    | 4.2                               | 10.44                    | 7.30                        | 2.95                        | 37.5                           |
| 13a | 120                                       | 10                                    | 3.6                               | 16.87                    | 6.98                        | 3.00                        | 39.1                           |
| 13a | 120                                       | 10                                    | 3.6                               | 14.43                    | 7.30                        | 3.05                        | 37.8                           |
| 13a | 120                                       | 10                                    | 3.6                               | 15.33                    | 8.00*                       | 3.05                        | 33.6*                          |

|     |     |    |     |       |       |      |       |
|-----|-----|----|-----|-------|-------|------|-------|
| 13b | 120 | 10 | 3.6 | 15.68 | 7.00  | 3.10 | 36.9  |
| 13b | 120 | 10 | 3.6 | 13.97 | 8.06* | 3.10 | 34.9* |
| 13b | 120 | 10 | 3.6 | 7.55  | 6.98  | 2.70 | 40.5  |
| 13c | 120 | 10 | 3.6 | 15.49 | 7.00  | 3.28 | 40.4  |
| 13c | 120 | 10 | 3.6 | 10.27 | 7.00  | 3.16 | 40.0  |
| 13c | 120 | 10 | 3.6 | 10.53 | 6.80  | 3.10 | 40.1  |

\* Outlier value.
